# Supplementary material for: Revealing the Variation and Stability of Bacterial Communities in Tomato Rhizosphere Microbiota
Source: PubMed Central journal article supplement (PMC7074737; doi:10.3390/microorganisms8020170), 2020-01-25

1 **Supplementary Information**

2 **Table S1 Summary of cultivar samples and data statistics for the read processing steps in**  
 3 **tomato cultivar experiment.**

| Sample ID | Tomato varieties                                    | Tomato cultivar   | Soil              | Raw reads | Clean reads |
|-----------|-----------------------------------------------------|-------------------|-------------------|-----------|-------------|
| XZ1       | <i>Solanum lycopersicum</i>                         | Xinzhongshu No. 4 | Lawn, Qishan (JX) | 28411     | 18712       |
| XZ2       | <i>Solanum lycopersicum</i>                         | Xinzhongshu No. 4 | Lawn, Qishan (JX) | 24513     | 15471       |
| XZ3       | <i>Solanum lycopersicum</i>                         | Xinzhongshu No. 4 | Lawn, Qishan (JX) | 27909     | 17746       |
| MG1       | <i>Solanum lycopersicum</i>                         | Meiguodahong 168  | Lawn, Qishan (JX) | 25638     | 15540       |
| MG2       | <i>Solanum lycopersicum</i>                         | Meiguodahong 168  | Lawn, Qishan (JX) | 26639     | 17478       |
| MG3       | <i>Solanum lycopersicum</i>                         | Meiguodahong 168  | Lawn, Qishan (JX) | 22169     | 15690       |
| HP1       | <i>Solanum lycopersicum</i> var. <i>cerasiforme</i> | Huangpiqiu        | Lawn, Qishan (JX) | 28568     | 16739       |
| HP2       | <i>Solanum lycopersicum</i> var. <i>cerasiforme</i> | Huangpiqiu        | Lawn, Qishan (JX) | 26316     | 16833       |
| HP3       | <i>Solanum lycopersicum</i> var. <i>cerasiforme</i> | Huangpiqiu        | Lawn, Qishan (JX) | 27349     | 15996       |
| HS1       | <i>Solanum lycopersicum</i> var. <i>cerasiforme</i> | Huangshengnvguo   | Lawn, Qishan (JX) | 25517     | 14498       |
| HS2       | <i>Solanum lycopersicum</i> var. <i>cerasiforme</i> | Huangshengnvguo   | Lawn, Qishan (JX) | 20749     | 12728       |
| HS3       | <i>Solanum lycopersicum</i> var. <i>cerasiforme</i> | Huangshengnvguo   | Lawn, Qishan (JX) | 28267     | 16903       |
| HT1       | <i>Solanum lycopersicum</i>                         | Huangshoutao      | Lawn, Qishan (JX) | 26674     | 16069       |
| HT2       | <i>Solanum lycopersicum</i>                         | Huangshoutao      | Lawn, Qishan (JX) | 26768     | 16546       |
| HT3       | <i>Solanum lycopersicum</i>                         | Huangshoutao      | Lawn, Qishan (JX) | 27751     | 17200       |
| HZ1       | <i>Solanum lycopersicum</i> var. <i>cerasiforme</i> | Huangzhenzhu      | Lawn, Qishan (JX) | 24884     | 16568       |
| HZ2       | <i>Solanum lycopersicum</i> var. <i>cerasiforme</i> | Huangzhenzhu      | Lawn, Qishan (JX) | 26258     | 17633       |
| HZ3       | <i>Solanum lycopersicum</i> var. <i>cerasiforme</i> | Huangzhenzhu      | Lawn, Qishan (JX) | 24790     | 16288       |
| QK1       | <i>Solanum lycopersicum</i> var. <i>cerasiforme</i> | Qiaokeli          | Lawn, Qishan (JX) | 29394     | 18035       |
| QK2       | <i>Solanum lycopersicum</i> var. <i>cerasiforme</i> | Qiaokeli          | Lawn, Qishan (JX) | 28477     | 17485       |
| QK3       | <i>Solanum lycopersicum</i> var. <i>cerasiforme</i> | Qiaokeli          | Lawn, Qishan (JX) | 23552     | 14081       |
| TC1       | <i>Solanum lycopersicum</i>                         | Tiancheng         | Lawn, Qishan (JX) | 24843     | 14616       |
| TC2       | <i>Solanum lycopersicum</i>                         | Tiancheng         | Lawn, Qishan (JX) | 24441     | 15109       |
| TC3       | <i>Solanum lycopersicum</i>                         | Tiancheng         | Lawn, Qishan (JX) | 27164     | 16295       |
| YT1       | <i>Solanum lycopersicum</i> var. <i>cerasiforme</i> | Yingtao           | Lawn, Qishan (JX) | 28020     | 18014       |
| YT2       | <i>Solanum lycopersicum</i> var. <i>cerasiforme</i> | Yingtao           | Lawn, Qishan (JX) | 28162     | 18888       |
| YT3       | <i>Solanum lycopersicum</i> var. <i>cerasiforme</i> | Yingtao           | Lawn, Qishan (JX) | 28380     | 19424       |
| ZW1       | <i>Solanum lycopersicum</i> var. <i>cerasiforme</i> | Ziwucai           | Lawn, Qishan (JX) | 25268     | 16009       |
| ZW2       | <i>Solanum lycopersicum</i> var. <i>cerasiforme</i> | Ziwucai           | Lawn, Qishan (JX) | 26187     | 15442       |
| ZW3       | <i>Solanum lycopersicum</i> var. <i>cerasiforme</i> | Ziwucai           | Lawn, Qishan (JX) | 26141     | 16555       |
| ZY1       | <i>Solanum lycopersicum</i> var. <i>cerasiforme</i> | Ziyixiannv        | Lawn, Qishan (JX) | 26296     | 15282       |
| ZY2       | <i>Solanum lycopersicum</i> var. <i>cerasiforme</i> | Ziyixiannv        | Lawn, Qishan (JX) | 27305     | 16177       |
| ZY3       | <i>Solanum lycopersicum</i> var. <i>cerasiforme</i> | Ziyixiannv        | Lawn, Qishan (JX) | 29874     | 17870       |

4

5

6

7

8 **Table S2 Summary of soil samples and data statistics for the read processing steps in soil**  
 9 **experiment.**

| Sample ID | Tomato                | Soil sample          | Soil category             | Raw reads | Clean reads |
|-----------|-----------------------|----------------------|---------------------------|-----------|-------------|
| CF1       | Meiguodahong 168 (MG) | Commodity            | Commercial nutrients soil | 30566     | 22487       |
| CF2       | Meiguodahong 168 (MG) | organic nutritional  | Commercial nutrients soil | 30305     | 21730       |
| CF3       | Meiguodahong 168 (MG) | soil                 | Commercial nutrients soil | 30565     | 21885       |
| DM1       | Meiguodahong 168 (MG) | Vegetable field,     | Natural field soil        | 28269     | 16995       |
| DM2       | Meiguodahong 168 (MG) | East star village in | Natural field soil        | 32127     | 19748       |
| DM3       | Meiguodahong 168 (MG) | FZ                   | Natural field soil        | 32009     | 19051       |
| HF1       | Meiguodahong 168 (MG) | Potted plant         | Commercial nutrients soil | 33852     | 22977       |
| HF2       | Meiguodahong 168 (MG) | nutrients soil       | Commercial nutrients soil | 29436     | 19241       |
| HF3       | Meiguodahong 168 (MG) |                      | Commercial nutrients soil | 27949     | 20106       |
| HQ1       | Meiguodahong 168 (MG) | Agriculture field,   | Natural field soil        | 27254     | 17633       |
| HQ2       | Meiguodahong 168 (MG) | Hongtang Bridge      | Natural field soil        | 26366     | 17515       |
| HQ3       | Meiguodahong 168 (MG) | North in FZ          | Natural field soil        | 26368     | 17355       |
| JX1       | Meiguodahong 168 (MG) | Lawn, Qishan         | Natural field soil        | 28769     | 18203       |
| JX2       | Meiguodahong 168 (MG) | Campus of FNU        | Natural field soil        | 25124     | 14920       |
| JX3       | Meiguodahong 168 (MG) |                      | Natural field soil        | 29707     | 19291       |
| QS1       | Meiguodahong 168 (MG) | Forest, Qishan       | Natural field soil        | 32130     | 19751       |
| QS2       | Meiguodahong 168 (MG) | forest park in       | Natural field soil        | 28170     | 18167       |
| QS3       | Meiguodahong 168 (MG) | Fuzhou               | Natural field soil        | 42677     | 26567       |
| XC1       | Meiguodahong 168 (MG) | Garden soil in       | Natural field soil        | 29513     | 19609       |
| XC2       | Meiguodahong 168 (MG) | Minhou, FZ           | Natural field soil        | 30159     | 19913       |
| XC3       | Meiguodahong 168 (MG) |                      | Natural field soil        | 29906     | 19520       |

10

11

12 **Table S3 Basic biochemical parameters of the soil samples.**

| <b>Sample ID</b> | <b>Organic matter(%)</b> | <b>pH</b> | <b>P(mg/kg)</b> | <b>Zn(mg/kg)</b> | <b>Mn(mg/kg)</b> | <b>Cu(mg/kg)</b> | <b>Fe(mg/kg)</b> | <b>K(mg/kg)</b> | <b>Mg(mg/kg)</b> |
|------------------|--------------------------|-----------|-----------------|------------------|------------------|------------------|------------------|-----------------|------------------|
| CF-1             | 31.93                    | 6.74      | 933.09          | 183.61           | 620.28           | 31.87            | 45537.03         | 6025.04         | 40560.82         |
| CF-2             | 30.79                    | 6.8       | 942.91          | 176.82           | 592.74           | 31.87            | 38937.23         | 5032.41         | 34426.91         |
| CF-3             | 30.82                    | 6.67      | 928.15          | 183.28           | 509.23           | 32.63            | 39307.43         | 5723.84         | 40016.27         |
| DM-1             | 2.29                     | 6.78      | 106.08          | 140.32           | 665.06           | 31.92            | 28217.96         | 3060.03         | 18476.88         |
| DM-2             | 2.13                     | 6.83      | 106.57          | 130.8            | 625.75           | 28.24            | 27685.28         | 1869.38         | 18153.78         |
| DM-3             | 1.89                     | 6.65      | 107.91          | 136.52           | 655.19           | 29.52            | 27912.48         | 2252.36         | 22612.62         |
| HF-1             | 27.89                    | 7.05      | 1368.7          | 185.7            | 561.77           | 25.17            | 24138.34         | 10844.15        | 77439.58         |
| HF-2             | 28.44                    | 7.13      | 1368.69         | 205.15           | 609.74           | 26.5             | 25611.36         | 11782.79        | 85016.66         |
| HF-3             | 28.12                    | 7.12      | 1346.01         | 198.12           | 594.03           | 26               | 24321.26         | 9706.74         | 80572.16         |
| HQ-1             | 0.9                      | 6.67      | 19.64           | 127.01           | 839.39           | 24.52            | 36865.54         | 1285.54         | 21959.87         |
| HQ-2             | 0.87                     | 6.64      | 18.66           | 125.2            | 827.84           | 24.25            | 33999.07         | 1301.41         | 50945.2          |
| HQ-3             | 0.93                     | 6.38      | 20.23           | 122.22           | 843.56           | 23.85            | 35566.91         | 1104.78         | 69723.96         |
| JX-1             | 2.42                     | 7.07      | 35.80           | 121.4            | 782.36           | 22.63            | 31985            | 1840.84         | 22183.16         |
| JX-2             | 1.11                     | 7.04      | 36.78           | 111.57           | 716.5            | 23.24            | 30673.98         | 1819.35         | 24027.86         |
| JX-3             | 2.02                     | 7.02      | 33.73           | 118.09           | 801.84           | 23.02            | 30000.71         | 2222.55         | 20083.63         |
| QS-1             | 2.15                     | 6.54      | 18.17           | 90.95            | 133.66           | 16.93            | 32893.21         | 1455.85         | 4444.98          |
| QS-2             | 2.13                     | 6.54      | 17.7            | 85.65            | 128.56           | 17.68            | 29971.36         | 1092.72         | 4406.52          |
| QS-3             | 2.67                     | 6.81      | 17              | 80.73            | 125.05           | 17.17            | 31375.51         | 1616.57         | 4661.77          |
| XC-1             | 1.95                     | 6.99      | 123.27          | 137.49           | 786.56           | 44.57            | 28477.41         | 2778.88         | 28693.76         |
| XC-2             | 1.95                     | 7         | 123.76          | 141.36           | 823              | 43.47            | 29342.97         | 1516.52         | 24089.71         |
| XC-3             | 1.86                     | 7         | 124.23          | 138.74           | 778.02           | 46.12            | 30332.05         | 2321.67         | 24834.90         |

14 **Table S4 Summary of species richness and diversity indexes for all the samples in cultivar**  
 15 **experiment.**

| Sample | Seq_num | OTU_num | Chao1   | ACE     | Shannon | Simpson | PD_whole_tree | Fisher_alpha | Coverage |
|--------|---------|---------|---------|---------|---------|---------|---------------|--------------|----------|
| HP1    | 12728   | 1925    | 2761.48 | 2796.56 | 9.43    | 0.9964  | 116.48        | 630.42       | 94.19%   |
| HP2    | 12728   | 1945    | 2773.85 | 2782.76 | 9.42    | 0.9962  | 116.63        | 639.97       | 94.19%   |
| HP3    | 12728   | 1944    | 2892.04 | 2886.18 | 9.41    | 0.9963  | 115.73        | 639.49       | 93.90%   |
| HS1    | 12728   | 2116    | 3196.03 | 3141.37 | 9.61    | 0.9970  | 123.57        | 724.21       | 93.24%   |
| HS2    | 12728   | 2137    | 3037.92 | 3159.64 | 9.65    | 0.9972  | 118.30        | 734.87       | 93.38%   |
| HS3    | 12728   | 2109    | 2918.01 | 3014.19 | 9.56    | 0.9966  | 123.32        | 720.67       | 93.66%   |
| HT1    | 12728   | 2174    | 3274.01 | 3219.18 | 9.71    | 0.9972  | 122.34        | 753.83       | 93.10%   |
| HT2    | 12728   | 2167    | 3157.31 | 3268.29 | 9.70    | 0.9973  | 124.44        | 750.23       | 93.12%   |
| HT3    | 12728   | 2025    | 2948.61 | 2946.39 | 9.49    | 0.9965  | 115.85        | 678.80       | 93.77%   |
| HZ1    | 12728   | 2129    | 2849.35 | 2888.84 | 9.68    | 0.9965  | 120.38        | 730.80       | 94.09%   |
| HZ2    | 12728   | 2127    | 2954.56 | 2995.75 | 9.75    | 0.9971  | 121.04        | 729.78       | 93.86%   |
| HZ3    | 12728   | 1783    | 2548.60 | 2610.82 | 9.05    | 0.9930  | 105.40        | 564.38       | 94.54%   |
| MG1    | 12728   | 2033    | 3032.67 | 3030.72 | 9.52    | 0.9965  | 119.93        | 682.74       | 93.60%   |
| MG2    | 12728   | 2155    | 3346.58 | 3292.27 | 9.55    | 0.9961  | 124.76        | 744.07       | 92.94%   |
| MG3    | 12728   | 1889    | 2617.04 | 2685.70 | 9.38    | 0.9961  | 112.34        | 613.38       | 94.49%   |
| QK1    | 12728   | 2016    | 2867.86 | 2964.52 | 9.47    | 0.9965  | 116.07        | 674.39       | 93.81%   |
| QK2    | 12728   | 1894    | 2889.34 | 2877.14 | 9.32    | 0.9960  | 115.50        | 615.74       | 93.93%   |
| QK3    | 12728   | 1863    | 2695.22 | 2680.76 | 9.34    | 0.9961  | 111.28        | 601.20       | 94.40%   |
| TC1    | 12728   | 2116    | 3186.03 | 3168.55 | 9.62    | 0.9970  | 120.51        | 724.21       | 93.24%   |
| TC2    | 12728   | 1991    | 3080.35 | 3038.50 | 9.42    | 0.9962  | 118.05        | 662.18       | 93.55%   |
| TC3    | 12728   | 1989    | 2947.09 | 2926.92 | 9.45    | 0.9962  | 113.31        | 661.21       | 93.82%   |
| XZ1    | 12728   | 1867    | 2707.31 | 2658.92 | 9.28    | 0.9943  | 113.05        | 603.07       | 94.45%   |
| XZ2    | 12728   | 1944    | 2563.10 | 2640.31 | 9.50    | 0.9960  | 115.09        | 639.49       | 94.74%   |
| XZ3    | 12728   | 1951    | 2682.03 | 2684.10 | 9.57    | 0.9969  | 113.26        | 642.85       | 94.56%   |
| YT1    | 12728   | 2096    | 3057.80 | 3148.23 | 9.52    | 0.9963  | 123.11        | 714.11       | 93.38%   |
| YT2    | 12728   | 2236    | 3366.15 | 3370.41 | 9.71    | 0.9968  | 130.56        | 786.11       | 92.81%   |
| YT3    | 12728   | 2272    | 3338.72 | 3397.30 | 9.75    | 0.9966  | 131.57        | 805.14       | 92.81%   |
| ZW1    | 12728   | 2017    | 2929.52 | 2978.42 | 9.55    | 0.9967  | 113.33        | 674.88       | 93.76%   |
| ZW2    | 12728   | 2021    | 2827.72 | 2899.19 | 9.54    | 0.9966  | 115.18        | 676.84       | 93.95%   |
| ZW3    | 12728   | 1956    | 2661.06 | 2738.85 | 9.56    | 0.9969  | 110.16        | 645.25       | 94.41%   |
| ZY1    | 12728   | 1935    | 2755.87 | 2791.20 | 9.42    | 0.9964  | 114.07        | 635.19       | 94.18%   |
| ZY2    | 12728   | 1621    | 2423.31 | 2315.93 | 9.21    | 0.9964  | 96.69         | 492.78       | 95.32%   |
| ZY3    | 12728   | 1883    | 2765.03 | 2802.24 | 9.33    | 0.8859  | 114.3         | 610.56       | 94.19%   |

17 **Table S5 Summary of species richness and diversity indexes for all samples in soil**  
 18 **experiment.**

| Sample | Seq_num | OTU_num | Chao1   | ACE     | Shannon | Simpson | PD_whole_tree | Fisher_alpha | Coverage |
|--------|---------|---------|---------|---------|---------|---------|---------------|--------------|----------|
| CF1    | 14920   | 1321    | 1548.78 | 1579.95 | 8.82    | 0.9953  | 96.50         | 349.82       | 97.81%   |
| CF2    | 14920   | 1292    | 1530.88 | 1552.33 | 8.76    | 0.9949  | 92.60         | 339.51       | 97.85%   |
| CF3    | 14920   | 1327    | 1637.86 | 1676.66 | 8.75    | 0.9952  | 95.80         | 351.97       | 97.47%   |
| DM1    | 14920   | 1659    | 2238.38 | 2249.22 | 8.70    | 0.9904  | 91.27         | 477.68       | 96.21%   |
| DM2    | 14920   | 1817    | 2363.44 | 2372.66 | 9.33    | 0.9962  | 100.49        | 542.35       | 96.15%   |
| DM3    | 14920   | 1978    | 2652.42 | 2593.50 | 9.52    | 0.9967  | 104.60        | 611.49       | 95.68%   |
| HF1    | 14920   | 1151    | 1408.09 | 1382.94 | 8.46    | 0.9936  | 84.61         | 290.89       | 98.06%   |
| HF2    | 14920   | 1143    | 1410.69 | 1387.13 | 8.35    | 0.9924  | 82.77         | 288.21       | 98.02%   |
| HF3    | 14920   | 1081    | 1305.86 | 1316.10 | 8.21    | 0.9913  | 77.40         | 267.68       | 98.14%   |
| HQ1    | 14920   | 1875    | 2406.21 | 2400.24 | 9.36    | 0.9963  | 111.38        | 566.87       | 96.12%   |
| HQ2    | 14920   | 1792    | 2415.88 | 2381.03 | 9.00    | 0.9945  | 103.77        | 531.90       | 95.97%   |
| HQ3    | 14920   | 1880    | 2646.95 | 2591.31 | 9.27    | 0.9957  | 106.38        | 569.01       | 95.55%   |
| JX1    | 14920   | 1838    | 2419.09 | 2431.66 | 9.46    | 0.9970  | 107.08        | 551.18       | 96.05%   |
| JX2    | 14920   | 1875    | 2402.71 | 2409.32 | 9.55    | 0.9969  | 108.32        | 566.87       | 96.21%   |
| JX3    | 14920   | 1808    | 2345.19 | 2386.67 | 9.36    | 0.9959  | 100.95        | 538.58       | 96.17%   |
| QS1    | 14920   | 1440    | 1775.00 | 1791.24 | 8.69    | 0.9923  | 85.97         | 393.22       | 97.29%   |
| QS2    | 14920   | 1474    | 1843.36 | 1836.23 | 9.07    | 0.9961  | 87.97         | 405.94       | 97.25%   |
| QS3    | 14920   | 1461    | 1866.39 | 1873.45 | 8.74    | 0.9927  | 87.15         | 401.06       | 97.07%   |
| XC1    | 14920   | 1824    | 2344.27 | 2357.86 | 9.37    | 0.9966  | 102.80        | 545.28       | 96.23%   |
| XC2    | 14920   | 1793    | 2271.13 | 2273.02 | 9.29    | 0.9961  | 99.11         | 532.32       | 96.40%   |
| XC3    | 14920   | 1656    | 2356.01 | 2306.41 | 8.73    | 0.9919  | 93.7          | 476.48       | 95.99%   |

19  
 20  
 21

22 **Table S6 Taxonomic compositions and relative abundances of the core OTUs identified in**  
 23 **the cultivar and soil experiments, respectively.**

| <b>Taxonomic assignment</b> | <b>Tomato cultivar</b> | <b>Soil</b> | <b>Soil (exclude HF and CF)</b> |
|-----------------------------|------------------------|-------------|---------------------------------|
| Sphingobacteriales          | 16.53%                 | 3.74%       | 8.69%                           |
| Rhizobiales                 | 4.58%                  | 24.67%      | 11.75%                          |
| Subgroup 6                  | 7.28%                  | 4.46%       | 4.77%                           |
| Sphingomonadales            | 1.63%                  | 15.37%      | 8.17%                           |
| Xanthomonadales             | 6.68%                  | 7.10%       | 5.99%                           |
| Subgroup 4                  | 7.06%                  | 2.61%       | 5.66%                           |
| Nitrosomonadales            | 6.50%                  | 4.04%       | 5.23%                           |
| Cytophagales                | 5.92%                  | 0           | 1.86%                           |
| Burkholderiales             | 3.49%                  | 1.50%       | 5.63%                           |
| Myxococcales                | 3.04%                  | 2.68%       | 3.16%                           |
| TRA3-20                     | 3.38%                  | 0.79%       | 0.56%                           |
| Gemmatimonadales            | 3.16%                  | 0           | 1.98%                           |
| Micrococcales               | 0.15%                  | 7.27%       | 3.20%                           |
| Rhodospirillales            | 1.54%                  | 3.93%       | 2.96%                           |
| Caulobacterales             | 0.44%                  | 3.04%       | 0.79%                           |
| Anaerolineales              | 1.09%                  | 0           | 3.58%                           |
| Subgroup 3                  | 2.01%                  | 0           | 1.84%                           |
| Nitrospirales               | 1.79%                  | 1.48%       | 2.14%                           |
| Streptomycetales            | 0.16%                  | 3.01%       | 1.35%                           |
| Others                      | 23.59%                 | 14.30%      | 20.72%                          |

24 Note: The relative abundance for each bacterial order was calculated by the reads number of the  
 25 core OTUs belonged to the community accounting for the total reads number of core OTUs  
 26 identified in each experiment.

27

28 **Table S7 Taxonomic identification of the most abundant 100 OTUs in the microbiota of**  
 29 **tomato cultivar samples in cultivar experiment.**

| OUT ID  | HP  | HS  | HT  | HZ   | MG  | QK  | TC  | XZ   | YT  | ZW  | ZY  | Consensus Lineage                  |
|---------|-----|-----|-----|------|-----|-----|-----|------|-----|-----|-----|------------------------------------|
| OTU_1   | 676 | 664 | 786 | 605  | 787 | 710 | 917 | 396  | 695 | 986 | 710 | Bacteroidetes; Sphingobacteriales  |
| OTU_5   | 637 | 511 | 290 | 1015 | 867 | 533 | 408 | 521  | 880 | 586 | 527 | Verrucomicrobia; Uncultured        |
| OTU_2   | 645 | 410 | 352 | 34   | 755 | 905 | 610 | 1    | 542 | 272 | 804 | Bacteroidetes; Sphingobacteriales  |
| OTU_42  | 540 | 375 | 245 | 166  | 525 | 452 | 402 | 337  | 632 | 138 | 506 | Proteobacteria; TRA3-20            |
| OTU_4   | 621 | 408 | 259 | 203  | 255 | 595 | 349 | 153  | 481 | 270 | 418 | Gemmatimonadetes; Gemmatimonadales |
| OTU_47  | 190 | 319 | 468 | 774  | 185 | 209 | 326 | 582  | 314 | 374 | 207 | Proteobacteria; Nitrosomonadales   |
| OTU_13  | 388 | 380 | 405 | 147  | 426 | 407 | 393 | 149  | 192 | 348 | 437 | Proteobacteria; Xanthomonadales    |
| OTU_32  | 497 | 333 | 193 | 120  | 363 | 513 | 352 | 48   | 312 | 350 | 467 | Proteobacteria; GR-WP33-30         |
| OTU_19  | 58  | 260 | 152 | 521  | 295 | 45  | 276 | 1489 | 86  | 28  | 16  | Proteobacteria; Methylophilales    |
| OTU_7   | 420 | 312 | 164 | 103  | 264 | 328 | 302 | 269  | 263 | 163 | 272 | Nitrospirae; Nitrospirales         |
| OTU_3   | 224 | 280 | 347 | 108  | 259 | 291 | 310 | 48   | 170 | 359 | 253 | Acidobacteria; Subgroup 4          |
| OTU_15  | 309 | 288 | 251 | 94   | 161 | 267 | 273 | 198  | 207 | 120 | 303 | Proteobacteria; Rhizobiales        |
| OTU_8   | 94  | 283 | 273 | 193  | 277 | 180 | 199 | 213  | 268 | 287 | 174 | Bacteroidetes; Sphingobacteriales  |
| OTU_6   | 265 | 198 | 272 | 50   | 245 | 307 | 365 | 21   | 86  | 269 | 305 | Bacteroidetes; Cytophagales        |
| OTU_14  | 263 | 242 | 163 | 94   | 369 | 254 | 211 | 171  | 200 | 125 | 280 | Proteobacteria; Xanthomonadales    |
| OTU_27  | 373 | 282 | 215 | 69   | 192 | 262 | 242 | 25   | 200 | 215 | 276 | Acidobacteria; Subgroup 6          |
| OTU_22  | 216 | 297 | 338 | 49   | 234 | 239 | 252 | 56   | 132 | 302 | 213 | Acidobacteria; Subgroup 4          |
| OTU_53  | 254 | 236 | 165 | 100  | 162 | 242 | 233 | 143  | 152 | 153 | 241 | Proteobacteria; Nitrosomonadales   |
| OTU_34  | 139 | 197 | 258 | 196  | 130 | 130 | 148 | 307  | 248 | 124 | 169 | Proteobacteria; Rhizobiales        |
| OTU_137 | 212 | 192 | 90  | 150  | 250 | 202 | 168 | 163  | 329 | 86  | 203 | Bacteroidetes; Cytophagales        |
| OTU_59  | 118 | 257 | 172 | 133  | 288 | 160 | 169 | 162  | 187 | 252 | 140 | Verrucomicrobia; Uncultured        |
| OTU_9   | 209 | 185 | 224 | 32   | 222 | 257 | 288 | 23   | 114 | 207 | 238 | Acidobacteria; Subgroup 4          |
| OTU_10  | 223 | 190 | 310 | 74   | 194 | 169 | 240 | 35   | 61  | 207 | 281 | Proteobacteria; Xanthomonadales    |
| OTU_21  | 249 | 152 | 131 | 128  | 184 | 218 | 187 | 75   | 142 | 189 | 239 | Proteobacteria                     |
| OTU_29  | 166 | 149 | 99  | 182  | 201 | 186 | 107 | 143  | 360 | 95  | 181 | Proteobacteria; Desulfuromonadales |
| OTU_28  | 187 | 135 | 269 | 123  | 164 | 192 | 244 | 61   | 153 | 164 | 149 | Proteobacteria; Sphingomonadales   |
| OTU_74  | 148 | 142 | 205 | 97   | 223 | 156 | 148 | 43   | 173 | 272 | 155 | Verrucomicrobia; Uncultured        |
| OTU_76  | 171 | 160 | 235 | 96   | 156 | 143 | 189 | 62   | 91  | 196 | 245 | Acidobacteria; Subgroup 6          |
| OTU_689 | 257 | 181 | 157 | 41   | 150 | 196 | 208 | 35   | 124 | 151 | 236 | Acidobacteria; Subgroup 6          |
| OTU_11  | 220 | 197 | 152 | 54   | 221 | 211 | 146 | 55   | 99  | 168 | 206 | Acidobacteria; Subgroup 11         |
| OTU_30  | 183 | 154 | 150 | 16   | 177 | 338 | 241 | 11   | 45  | 151 | 263 | Acidobacteria; Subgroup 4          |
| OTU_45  | 92  | 126 | 87  | 208  | 118 | 122 | 108 | 246  | 279 | 137 | 103 | Bacteroidetes; Sphingobacteriales  |
| OTU_18  | 273 | 213 | 79  | 20   | 176 | 174 | 168 | 150  | 159 | 17  | 162 | Proteobacteria                     |
| OTU_83  | 143 | 160 | 150 | 103  | 130 | 169 | 148 | 83   | 121 | 278 | 104 | Acidobacteria; Subgroup 4          |
| OTU_24  | 88  | 141 | 202 | 164  | 128 | 81  | 101 | 232  | 226 | 106 | 116 | Bacteroidetes; Cytophagales        |
| OTU_134 | 155 | 144 | 152 | 78   | 162 | 176 | 239 | 67   | 47  | 134 | 199 | Proteobacteria; Burkholderiales    |
| OTU_20  | 105 | 106 | 133 | 175  | 119 | 107 | 94  | 188  | 188 | 200 | 103 | Verrucomicrobia; Uncultured        |
| OTU_64  | 62  | 174 | 167 | 283  | 114 | 116 | 104 | 205  | 75  | 97  | 74  | Proteobacteria; Burkholderiales    |
| OTU_12  | 261 | 145 | 83  | 13   | 131 | 251 | 163 | 0    | 114 | 81  | 208 | Proteobacteria; Nitrosomonadales   |
| OTU_33  | 138 | 128 | 109 | 120  | 126 | 126 | 128 | 45   | 67  | 286 | 140 | Acidobacteria; Subgroup 5          |
| OTU_44  | 160 | 92  | 126 | 108  | 91  | 114 | 147 | 29   | 26  | 343 | 145 | Proteobacteria; Rhodospirillales   |
| OTU_96  | 214 | 122 | 65  | 51   | 228 | 142 | 114 | 29   | 192 | 98  | 117 | Verrucomicrobia; Uncultured        |
| OTU_48  | 148 | 127 | 108 | 21   | 181 | 152 | 173 | 66   | 156 | 76  | 123 | Proteobacteria;                    |

|         |     |     |     |     |     |     |     |     |     |     |     |                                    |
|---------|-----|-----|-----|-----|-----|-----|-----|-----|-----|-----|-----|------------------------------------|
| OTU_67  | 132 | 155 | 169 | 42  | 133 | 153 | 131 | 39  | 62  | 141 | 173 | Acidobacteria; Subgroup 6          |
| OTU_25  | 177 | 127 | 121 | 13  | 148 | 162 | 165 | 0   | 140 | 88  | 189 | Acidobacteria; Subgroup 6          |
| OTU_63  | 236 | 114 | 85  | 9   | 168 | 188 | 156 | 0   | 139 | 60  | 166 | Proteobacteria; TRA3-20            |
| OTU_49  | 58  | 116 | 226 | 152 | 71  | 90  | 82  | 211 | 120 | 124 | 70  | Proteobacteria; Rhizobiales        |
| OTU_286 | 68  | 166 | 143 | 215 | 79  | 77  | 112 | 236 | 60  | 91  | 57  | Proteobacteria; Nitrosomonadales   |
| OTU_62  | 80  | 108 | 107 | 218 | 83  | 75  | 74  | 150 | 162 | 133 | 77  | Verrucomicrobia; Opitutales        |
| OTU_36  | 50  | 93  | 60  | 423 | 83  | 41  | 39  | 211 | 146 | 42  | 42  | Verrucomicrobia; Uncultured        |
| OTU_214 | 203 | 126 | 61  | 17  | 153 | 163 | 162 | 1   | 127 | 54  | 152 | Proteobacteria; TRA3-20            |
| OTU_17  | 132 | 85  | 103 | 14  | 191 | 157 | 202 | 0   | 97  | 85  | 121 | Bacteroidetes; Sphingobacteriales  |
| OTU_406 | 81  | 101 | 148 | 134 | 78  | 91  | 139 | 78  | 102 | 87  | 144 | Proteobacteria; Nitrosomonadales   |
| OTU_39  | 91  | 85  | 73  | 111 | 115 | 123 | 130 | 88  | 175 | 73  | 110 | Bacteroidetes; Sphingobacteriales  |
| OTU_16  | 60  | 109 | 70  | 134 | 78  | 107 | 101 | 160 | 114 | 127 | 88  | Cyanobacteria; D_2_Chloroplast     |
| OTU_72  | 103 | 103 | 58  | 106 | 97  | 80  | 91  | 36  | 94  | 277 | 84  | Verrucomicrobia; Uncultured        |
| OTU_478 | 54  | 217 | 171 | 46  | 52  | 73  | 94  | 152 | 91  | 126 | 51  | Acidobacteria; Subgroup 3          |
| OTU_166 | 123 | 61  | 94  | 88  | 142 | 100 | 186 | 27  | 65  | 111 | 126 | Proteobacteria; Xanthomonadales    |
| OTU_340 | 36  | 223 | 73  | 82  | 76  | 40  | 55  | 272 | 173 | 71  | 22  | Verrucomicrobia; Uncultured        |
| OTU_117 | 117 | 73  | 95  | 64  | 101 | 96  | 129 | 40  | 98  | 97  | 172 | Proteobacteria; Nitrosomonadales   |
| OTU_56  | 56  | 123 | 137 | 103 | 109 | 75  | 67  | 160 | 99  | 51  | 91  | Proteobacteria; Pseudomonadales    |
| OTU_135 | 135 | 123 | 113 | 69  | 77  | 106 | 122 | 55  | 73  | 97  | 99  | Proteobacteria; Nitrosomonadales   |
| OTU_51  | 74  | 80  | 124 | 37  | 134 | 116 | 147 | 25  | 55  | 110 | 159 | Bacteroidetes; Sphingobacteriales  |
| OTU_106 | 68  | 114 | 138 | 76  | 112 | 105 | 112 | 59  | 69  | 88  | 117 | Bacteroidetes; Sphingobacteriales  |
| OTU_71  | 138 | 91  | 63  | 61  | 90  | 134 | 104 | 78  | 108 | 75  | 113 | Acidobacteria; Uncultured          |
| OTU_230 | 136 | 82  | 99  | 42  | 89  | 139 | 129 | 5   | 39  | 155 | 137 | Proteobacteria; Uncultured         |
| OTU_145 | 60  | 86  | 144 | 93  | 119 | 93  | 82  | 65  | 76  | 105 | 76  | Bacteroidetes; Sphingobacteriales  |
| OTU_99  | 118 | 85  | 63  | 22  | 128 | 183 | 139 | 13  | 69  | 49  | 128 | Bacteroidetes; Cytophagales        |
| OTU_126 | 53  | 45  | 131 | 307 | 40  | 34  | 56  | 160 | 121 | 21  | 26  | Proteobacteria; Xanthomonadales    |
| OTU_300 | 61  | 94  | 108 | 128 | 68  | 90  | 107 | 128 | 40  | 83  | 84  | Proteobacteria; Burkholderiales    |
| OTU_50  | 154 | 84  | 67  | 32  | 82  | 152 | 98  | 30  | 86  | 71  | 132 | Acidobacteria; Uncultured          |
| OTU_94  | 113 | 52  | 105 | 116 | 146 | 104 | 102 | 4   | 17  | 115 | 109 | Bacteroidetes; Cytophagales        |
| OTU_128 | 67  | 130 | 126 | 61  | 57  | 85  | 81  | 102 | 71  | 81  | 73  | Proteobacteria; Rhodospirillales   |
| OTU_173 | 95  | 81  | 95  | 81  | 61  | 85  | 63  | 91  | 85  | 67  | 109 | Proteobacteria; Rhizobiales        |
| OTU_31  | 114 | 73  | 27  | 30  | 109 | 171 | 102 | 15  | 143 | 28  | 96  | Proteobacteria; Desulfuromonadales |
| OTU_26  | 37  | 70  | 76  | 169 | 76  | 59  | 59  | 102 | 122 | 90  | 41  | Bacteroidetes; Sphingobacteriales  |
| OTU_200 | 61  | 125 | 74  | 64  | 71  | 69  | 69  | 155 | 69  | 85  | 52  | Acidobacteria; Subgroup 5          |
| OTU_116 | 78  | 60  | 118 | 118 | 67  | 84  | 96  | 43  | 55  | 85  | 74  | Bacteroidetes; Sphingobacteriales  |
| OTU_374 | 6   | 155 | 118 | 85  | 49  | 45  | 28  | 173 | 140 | 38  | 12  | Acidobacteria; Subgroup 4          |
| OTU_73  | 102 | 53  | 78  | 95  | 91  | 62  | 95  | 28  | 76  | 101 | 51  | Bacteroidetes; Sphingobacteriales  |
| OTU_69  | 99  | 66  | 81  | 27  | 93  | 92  | 134 | 14  | 51  | 83  | 87  | Bacteroidetes; Sphingobacteriales  |
| OTU_54  | 138 | 47  | 60  | 45  | 93  | 118 | 75  | 20  | 47  | 45  | 130 | Bacteroidetes; Sphingobacteriales  |
| OTU_92  | 114 | 54  | 73  | 59  | 96  | 57  | 125 | 0   | 69  | 85  | 77  | Proteobacteria; Xanthomonadales    |
| OTU_776 | 89  | 50  | 95  | 96  | 96  | 87  | 81  | 8   | 18  | 99  | 84  | Bacteroidetes; Cytophagales        |
| OTU_231 | 8   | 49  | 17  | 305 | 51  | 11  | 99  | 246 | 5   | 7   | 5   | Proteobacteria; Methylophilales    |
| OTU_108 | 60  | 49  | 50  | 91  | 80  | 57  | 77  | 54  | 108 | 101 | 65  | Bacteroidetes; Sphingobacteriales  |
| OTU_210 | 47  | 56  | 95  | 137 | 43  | 90  | 84  | 73  | 55  | 64  | 43  | Proteobacteria; Xanthomonadales    |
| OTU_183 | 133 | 62  | 62  | 39  | 74  | 88  | 68  | 3   | 30  | 144 | 79  | Acidobacteria; Subgroup 6          |
| OTU_75  | 116 | 73  | 59  | 62  | 69  | 104 | 84  | 0   | 50  | 74  | 83  | Proteobacteria; Nitrosomonadales   |
| OTU_124 | 75  | 70  | 69  | 31  | 76  | 104 | 97  | 43  | 82  | 46  | 81  | Proteobacteria; Rhodocyclales      |



|          |     |    |     |     |     |     |     |     |    |     |     |                                   |
|----------|-----|----|-----|-----|-----|-----|-----|-----|----|-----|-----|-----------------------------------|
| OTU_61   | 1   | 77 | 135 | 91  | 36  | 17  | 24  | 282 | 87 | 17  | 1   | Verrucomicrobia; OPB35 group      |
| OTU_23   | 91  | 60 | 93  | 1   | 55  | 133 | 100 | 0   | 21 | 26  | 175 | Proteobacteria; Myxococcales      |
| OTU_37   | 163 | 42 | 34  | 28  | 40  | 124 | 72  | 0   | 47 | 65  | 122 | Latescibacteria; Uncultured       |
| OTU_245  | 71  | 97 | 71  | 41  | 61  | 88  | 88  | 70  | 52 | 47  | 51  | Proteobacteria; Myxococcales      |
| OTU_174  | 64  | 65 | 33  | 81  | 78  | 69  | 42  | 89  | 98 | 56  | 53  | Verrucomicrobia; Uncultured       |
| OTU_120  | 78  | 74 | 34  | 89  | 49  | 51  | 30  | 61  | 99 | 107 | 54  | Verrucomicrobia; Uncultured       |
| OTU_2617 | 13  | 50 | 125 | 92  | 20  | 93  | 89  | 140 | 53 | 31  | 19  | Proteobacteria; Sphingomonadales  |
| OTU_35   | 66  | 58 | 56  | 8   | 119 | 97  | 85  | 17  | 47 | 58  | 111 | Bacteroidetes; Sphingobacteriales |
| OTU_144  | 61  | 48 | 73  | 148 | 50  | 31  | 43  | 61  | 62 | 69  | 61  | Actinobacteria; Gaiellales        |
| OTU_100  | 86  | 69 | 119 | 21  | 50  | 91  | 96  | 15  | 15 | 66  | 78  | Proteobacteria; Burkholderiales   |

30 Note: Number of each OTU was presented as the total read number with three parallels for each treatment.

31

32 **Table S8 Taxonomic identification of the most abundant 100 OTUs in the microbiota of soil**  
 33 **samples in soil experiment.**

| <b>OTU ID</b> | <b>CF</b> | <b>HF</b> | <b>DM</b> | <b>HQ</b> | <b>JX</b> | <b>QS</b> | <b>XC</b> | <b>Consensus Lineage</b>            |
|---------------|-----------|-----------|-----------|-----------|-----------|-----------|-----------|-------------------------------------|
| OTU_15        | 41        | 41        | 1392      | 922       | 246       | 732       | 1196      | Proteobacteria; Sphingomonadales    |
| OTU_68        | 0         | 2         | 684       | 124       | 1124      | 77        | 406       | Bacteroidetes; Sphingobacteriales   |
| OTU_7         | 60        | 165       | 302       | 504       | 591       | 416       | 193       | Proteobacteria; Rhizobiales         |
| OTU_8         | 0         | 0         | 7         | 77        | 47        | 1920      | 0         | Acidobacteria; Subgroup 2           |
| OTU_77        | 0         | 2         | 251       | 751       | 208       | 7         | 758       | Chloroflexi; Anaerolineales         |
| OTU_2         | 21        | 89        | 393       | 964       | 13        | 31        | 410       | Actinobacteria; Micrococcales       |
| OTU_74        | 43        | 127       | 417       | 225       | 560       | 394       | 105       | Proteobacteria; Rhizobiales         |
| OTU_28        | 70        | 1705      | 1         | 1         | 4         | 6         | 0         | Proteobacteria; Methylophilales     |
| OTU_224       | 34        | 5         | 350       | 243       | 456       | 376       | 237       | Proteobacteria; Nitrosomonadales    |
| OTU_128       | 297       | 203       | 278       | 382       | 83        | 31        | 252       | Proteobacteria; Rhizobiales         |
| OTU_9         | 578       | 882       | 0         | 2         | 10        | 0         | 1         | Bacteroidetes; Cytophagales         |
| OTU_17        | 848       | 292       | 75        | 10        | 42        | 1         | 141       | Proteobacteria; Sphingomonadales    |
| OTU_49        | 310       | 79        | 100       | 690       | 45        | 40        | 97        | Actinobacteria; Micrococcales       |
| OTU_42        | 23        | 0         | 405       | 475       | 230       | 28        | 127       | Proteobacteria; Rhodospirillales    |
| OTU_338       | 0         | 1         | 600       | 36        | 92        | 31        | 476       | Acidobacteria; Subgroup 4           |
| OTU_51        | 267       | 491       | 53        | 190       | 58        | 36        | 138       | Proteobacteria; Rhizobiales         |
| OTU_18        | 8         | 1         | 281       | 94        | 60        | 29        | 757       | Acidobacteria; Subgroup 4           |
| OTU_6         | 240       | 963       | 4         | 5         | 9         | 1         | 6         | Actinobacteria; Streptosporangiales |
| OTU_5         | 742       | 451       | 4         | 2         | 2         | 0         | 1         | Actinobacteria; Acidimicrobiales    |
| OTU_25        | 0         | 1         | 45        | 483       | 227       | 347       | 83        | Proteobacteria; Burkholderiales     |
| OTU_1         | 97        | 1075      | 0         | 1         | 8         | 0         | 1         | Bacteroidetes; Order II             |
| OTU_252       | 7         | 5         | 361       | 32        | 496       | 78        | 181       | Acidobacteria; Subgroup 6           |
| OTU_55        | 58        | 219       | 169       | 278       | 109       | 13        | 309       | Actinobacteria; Streptomycetales    |
| OTU_66        | 188       | 154       | 372       | 38        | 176       | 104       | 119       | Proteobacteria; Xanthomonadales     |
| OTU_164       | 77        | 168       | 277       | 177       | 150       | 19        | 228       | Proteobacteria; Xanthomonadales     |
| OTU_148       | 1         | 0         | 144       | 112       | 414       | 264       | 158       | Proteobacteria; Xanthomonadales     |
| OTU_37        | 0         | 0         | 531       | 40        | 162       | 39        | 294       | Bacteroidetes; Cytophagales         |
| OTU_40        | 304       | 31        | 121       | 226       | 163       | 57        | 163       | Proteobacteria; Xanthomonadales     |
| OTU_11        | 401       | 597       | 4         | 12        | 4         | 0         | 9         | Proteobacteria; Oceanospirillales   |
| OTU_54        | 506       | 387       | 24        | 25        | 28        | 2         | 46        | Proteobacteria; Rhizobiales         |
| OTU_45        | 177       | 407       | 106       | 190       | 4         | 0         | 128       | Bacteroidetes; Cytophagales         |
| OTU_31        | 927       | 21        | 3         | 12        | 41        | 2         | 1         | Proteobacteria; Xanthomonadales     |
| OTU_10        | 74        | 901       | 0         | 1         | 13        | 1         | 0         | Chloroflexi; Anaerolineales         |
| OTU_97        | 55        | 28        | 147       | 572       | 29        | 2         | 152       | Actinobacteria; Propionibacteriales |
| OTU_4         | 373       | 585       | 0         | 1         | 7         | 0         | 1         | Chloroflexi; Anaerolineales         |
| OTU_52        | 243       | 613       | 47        | 35        | 2         | 0         | 9         | Actinobacteria; Acidimicrobiales    |
| OTU_250       | 6         | 4         | 511       | 20        | 192       | 30        | 168       | Acidobacteria; Subgroup 6           |
| OTU_60        | 5         | 4         | 347       | 13        | 130       | 308       | 107       | Proteobacteria; Rhizobiales         |
| OTU_90        | 0         | 0         | 11        | 152       | 80        | 663       | 2         | Acidobacteria; Acidobacteriales     |
| OTU_136       | 0         | 0         | 2         | 17        | 35        | 853       | 0         | Acidobacteria; Acidobacteriales     |
| OTU_3         | 847       | 19        | 4         | 9         | 3         | 0         | 18        | Proteobacteria; Caulobacteriales    |
| OTU_240       | 0         | 0         | 4         | 29        | 25        | 842       | 0         | Acidobacteria; Acidobacteriales     |
| OTU_167       | 6         | 0         | 152       | 26        | 385       | 195       | 135       | Verrucomicrobia; Uncultured         |

|          |     |     |     |     |     |     |     |                                    |
|----------|-----|-----|-----|-----|-----|-----|-----|------------------------------------|
| OTU_115  | 0   | 0   | 3   | 791 | 51  | 7   | 7   | Proteobacteria; Rhodocyclales      |
| OTU_27   | 0   | 1   | 1   | 47  | 4   | 1   | 763 | Proteobacteria; Burkholderiales    |
| OTU_184  | 114 | 0   | 68  | 93  | 149 | 193 | 182 | Nitrospirae; Nitrospirales         |
| OTU_50   | 0   | 0   | 178 | 67  | 233 | 209 | 88  | Nitrospirae; Nitrospirales         |
| OTU_34   | 12  | 92  | 218 | 112 | 14  | 9   | 314 | Bacteroidetes; Sphingobacteriales  |
| OTU_387  | 0   | 0   | 211 | 34  | 117 | 32  | 369 | Bacteroidetes; Sphingobacteriales  |
| OTU_102  | 3   | 0   | 138 | 416 | 29  | 0   | 167 | Proteobacteria; Pseudomonadales    |
| OTU_69   | 272 | 1   | 40  | 28  | 4   | 0   | 400 | Bacteroidetes; Sphingobacteriales  |
| OTU_36   | 0   | 0   | 710 | 0   | 0   | 20  | 11  | Bacteroidetes; Sphingobacteriales  |
| OTU_238  | 3   | 0   | 59  | 294 | 29  | 99  | 248 | Proteobacteria; Burkholderiales    |
| OTU_76   | 2   | 18  | 392 | 108 | 48  | 31  | 127 | Proteobacteria; Sphingomonadales   |
| OTU_379  | 0   | 0   | 6   | 7   | 159 | 530 | 0   | Acidobacteria; Subgroup 3          |
| OTU_227  | 0   | 1   | 95  | 147 | 156 | 159 | 130 | Bacteroidetes; Sphingobacteriales  |
| OTU_125  | 2   | 678 | 0   | 3   | 2   | 0   | 0   | Bacteroidetes; Flavobacteriales    |
| OTU_83   | 0   | 0   | 266 | 22  | 276 | 71  | 40  | Acidobacteria; Subgroup 11         |
| OTU_65   | 0   | 1   | 112 | 354 | 21  | 6   | 176 | Actinobacteria; Pseudonocardiales  |
| OTU_73   | 196 | 454 | 0   | 0   | 7   | 0   | 2   | Proteobacteria; Myxococcales       |
| OTU_20   | 0   | 64  | 152 | 132 | 64  | 103 | 142 | Proteobacteria; Sphingomonadales   |
| OTU_2179 | 0   | 0   | 9   | 26  | 140 | 472 | 5   | Verrucomicrobia; Uncultured        |
| OTU_12   | 25  | 619 | 0   | 1   | 0   | 0   | 0   | Proteobacteria; Myxococcales       |
| OTU_108  | 31  | 36  | 308 | 4   | 9   | 6   | 237 | Proteobacteria;                    |
| OTU_122  | 238 | 103 | 69  | 25  | 9   | 4   | 176 | Bacteroidetes; Sphingobacteriales  |
| OTU_757  | 0   | 0   | 230 | 99  | 171 | 40  | 78  | Proteobacteria; GR-WP33-30         |
| OTU_185  | 0   | 0   | 149 | 93  | 73  | 83  | 215 | Cyanobacteria                      |
| OTU_268  | 4   | 10  | 48  | 246 | 138 | 42  | 122 | Proteobacteria; Burkholderiales    |
| OTU_138  | 6   | 0   | 78  | 125 | 115 | 175 | 109 | Verrucomicrobia; Opitutales        |
| OTU_149  | 27  | 9   | 198 | 226 | 80  | 18  | 47  | Chloroflexi; KD4-96                |
| OTU_82   | 0   | 0   | 75  | 30  | 25  | 14  | 454 | Gemmatimonadetes; Gemmatimonadales |
| OTU_71   | 18  | 24  | 41  | 92  | 17  | 104 | 299 | Proteobacteria; Pseudomonadales    |
| OTU_477  | 229 | 362 | 0   | 0   | 0   | 0   | 0   | Gemmatimonadetes; Gemmatimonadales |
| OTU_29   | 0   | 0   | 154 | 4   | 406 | 5   | 22  | Latescibacteria; Uncultured        |
| OTU_92   | 0   | 0   | 368 | 18  | 169 | 8   | 25  | Gemmatimonadetes; Gemmatimonadales |
| OTU_207  | 154 | 281 | 30  | 88  | 8   | 0   | 24  | Proteobacteria; Rhizobiales        |
| OTU_179  | 1   | 0   | 89  | 63  | 100 | 229 | 101 | Proteobacteria; Nitrosomonadales   |
| OTU_35   | 473 | 14  | 16  | 20  | 28  | 0   | 29  | Proteobacteria; Myxococcales       |
| OTU_346  | 0   | 0   | 68  | 107 | 32  | 57  | 310 | Proteobacteria; Myxococcales       |
| OTU_415  | 8   | 2   | 125 | 113 | 159 | 139 | 27  | Proteobacteria; Rhodospirillales   |
| OTU_32   | 156 | 389 | 10  | 1   | 4   | 0   | 13  | Proteobacteria; Myxococcales       |
| OTU_604  | 26  | 22  | 65  | 127 | 85  | 142 | 92  | Proteobacteria; Myxococcales       |
| OTU_134  | 4   | 0   | 99  | 62  | 220 | 85  | 88  | Proteobacteria; Nitrosomonadales   |
| OTU_21   | 158 | 388 | 0   | 0   | 5   | 0   | 0   | Chloroflexi; Anaerolineales        |
| OTU_46   | 546 | 2   | 0   | 0   | 2   | 0   | 0   | Saccharibacteria; Uncultured       |
| OTU_211  | 171 | 66  | 80  | 69  | 42  | 68  | 54  | Proteobacteria; Rhizobiales        |
| OTU_944  | 45  | 17  | 83  | 167 | 105 | 69  | 60  | Actinobacteria                     |
| OTU_56   | 0   | 0   | 5   | 0   | 11  | 527 | 0   | Acidobacteria; Subgroup 2          |
| OTU_14   | 9   | 526 | 0   | 0   | 4   | 0   | 0   | Proteobacteria; Methylophilales    |
| OTU_220  | 52  | 81  | 11  | 9   | 57  | 312 | 15  | Proteobacteria; Rhizobiales        |

|         |     |     |     |     |     |     |     |                                   |
|---------|-----|-----|-----|-----|-----|-----|-----|-----------------------------------|
| OTU_62  | 8   | 1   | 56  | 49  | 145 | 5   | 268 | Proteobacteria; Sphingomonadales  |
| OTU_178 | 379 | 111 | 1   | 34  | 2   | 1   | 3   | Proteobacteria; Rhizobiales       |
| OTU_13  | 521 | 5   | 0   | 0   | 1   | 0   | 0   | Bacteroidetes; Sphingobacteriales |
| OTU_23  | 64  | 458 | 0   | 0   | 1   | 0   | 0   | Proteobacteria; Oceanospirillales |
| OTU_30  | 39  | 11  | 89  | 162 | 123 | 29  | 70  | Cyanobacteria                     |
| OTU_78  | 1   | 1   | 197 | 3   | 269 | 21  | 28  | Nitrospirae; Nitrospirales        |
| OTU_16  | 515 | 1   | 0   | 0   | 0   | 0   | 0   | Chloroflexi; Anaerolineales       |
| OTU_22  | 185 | 320 | 0   | 0   | 0   | 0   | 0   | TM6; Uncultured                   |
| OTU_174 | 0   | 0   | 156 | 5   | 76  | 120 | 145 | Bacteroidetes; Sphingobacteriales |
| OTU_132 | 0   | 0   | 0   | 9   | 89  | 402 | 0   | Bacteroidetes; Cytophagales       |

Note: Number of each OTU was presented as the total read number with three parallels for each treatment.

34  
35  
36

37 **Fig. S1 The composition and relative abundance of the major bacterial taxa in the tomato**  
 38 **rhizosphere microbiotas in cultivar experiment.** Each bar represents the average value of three  
 39 replicates in each sample group. A. The composition and relative abundance of major bacterial  
 40 phyla; B-D. The composition and relative abundance of the major bacterial orders from the phyla  
 41 of Bacteroidetes (B), Acidobacteria (C) and Proteobacteria (D); E. The composition and relative  
 42 abundance of the major bacterial orders from four classes of the phylum Proteobacteria: Alpha-,  
 43 Beta-, Delta- and Gamma-proteobacteria. Xinzhongshu No. 4 (XZ), Huangshoutao (HT),  
 44 Tiancheng (TC), Meiguodahong 168 (MG), Huapiqiu (HP), Huangshengnvguo (HS),  
 45 Huangzhenzhu (HZ), Qiaokeli (QK), Yingtao (YT), Ziwucai (ZW) and Ziyixiannv (ZY).

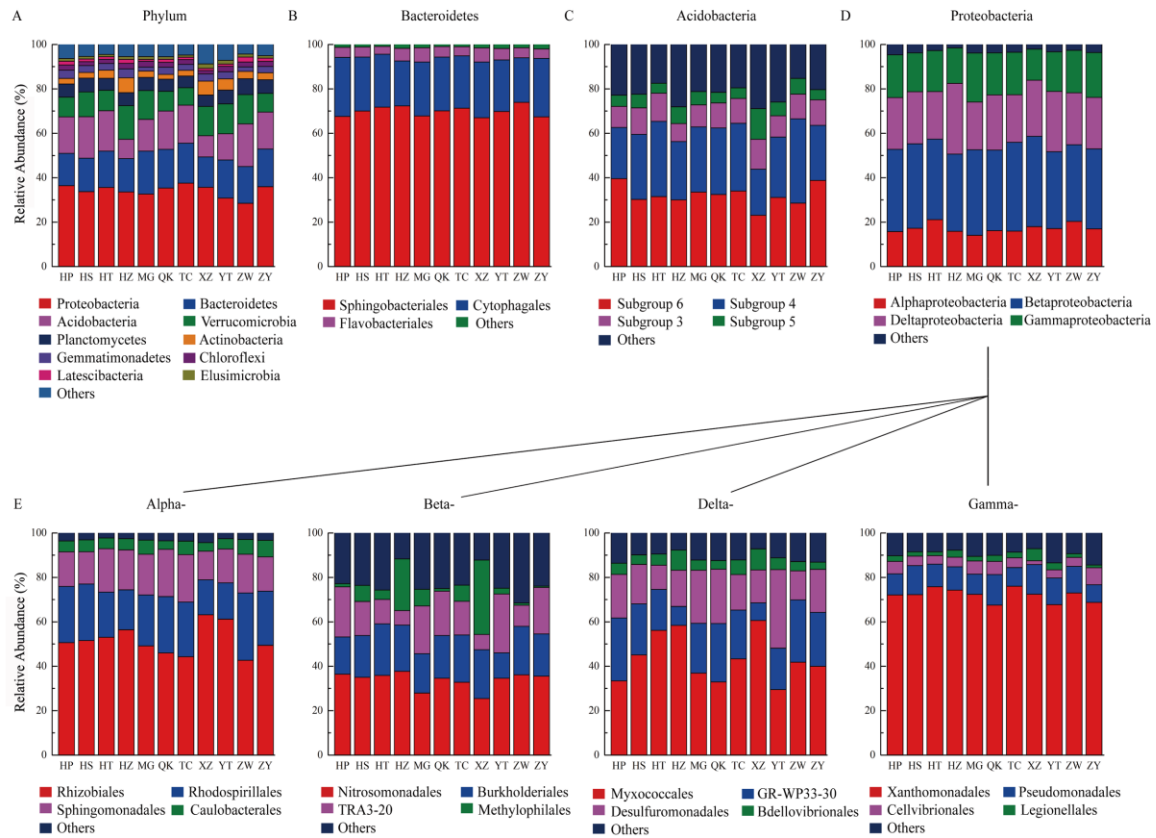

46

47

48 **Fig. S2 The percentage of core OTUs to be presented in the samples.** A: Tomato cultivar  
49 experiment; B: Soil experiment; C: soil experiment except for samples CF and HF.

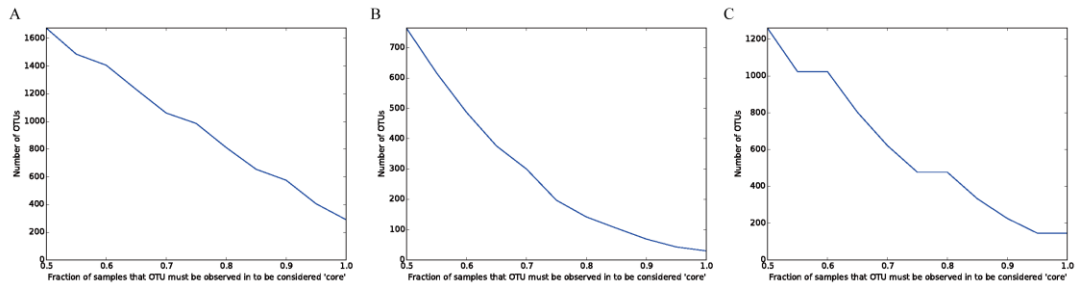

50

51

52 **Fig. S3 The OTU number boxplots and the rank abundance curves indicate OTU richness**  
 53 **of the sample in the cultivar and soil experiments, respectively.** The plots were drawn using  
 54 the average value of three replicates of each sample group. A. The OTU number boxplot  
 55 depicting OTU richness in the microbiota of tomato cultivar samples; B. The rank-abundance  
 56 curve depicting species richness and evenness in the microbiota of tomato cultivar samples; C.  
 57 The OTU number boxplot depicting OTU richness in the microbiota of soil samples; D. The rank-  
 58 abundance curve depicting species richness and evenness in the microbiota of soil samples.  
 59 Tomato cultivar experiment: Xinzhongshu No. 4 (XZ), Huangshoutao (HT), Tiancheng (TC),  
 60 Meiguodahong 168 (MG), Huapiqiu (HP), Huangshengnvguo (HS), Huangzhenzhu (HZ),  
 61 Qiaokeli (QK), Yingtao (YT), Ziwucaai (ZW) and Ziyixiannv (ZY); soil experiment: commodity  
 62 organic nutritional soil (CF), potted plant nutrients soil (HF), vegetable field soil (DM),  
 63 agricultural field soil (HQ), campus lawn (JX), forest soil (QS), garden soil (XC).

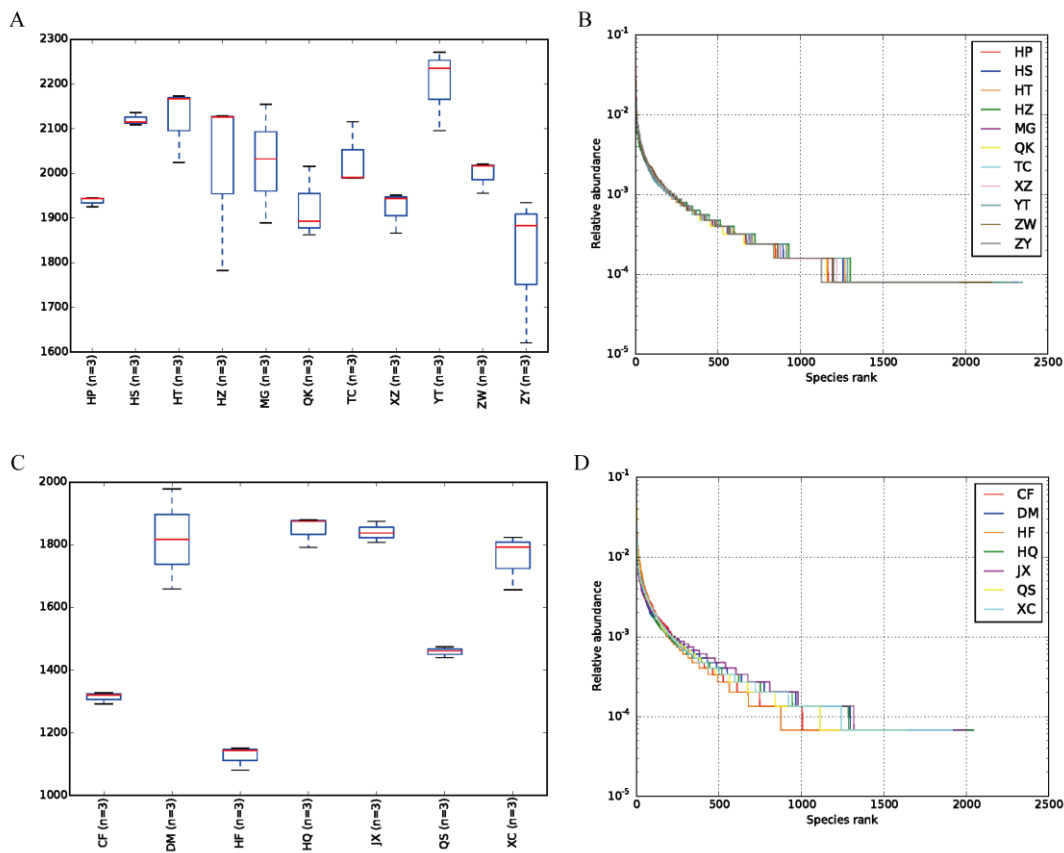

65 **Fig. S4 Rarefaction curves and the OTU number boxplot of the rhizosphere microbiota in**  
 66 **the cultivar or soil experiments.** A. Rarefaction curves of the different tomato cultivar samples  
 67 in cultivar experiment; B. Rarefaction curves of the different sources of soil samples in soil  
 68 experiment; C. Rarefaction curves of all samples in both the cultivar and soil experiments; D. The  
 69 OTU number boxplot of the samples in both the cultivar and soil experiments.

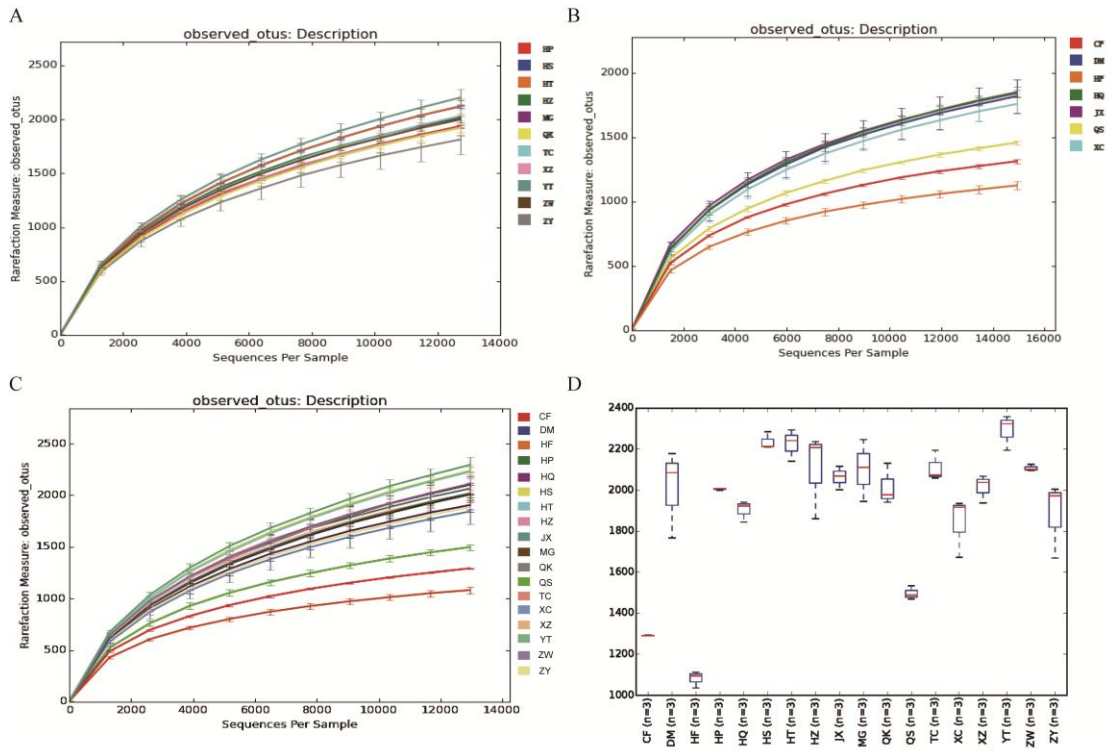

70

71



72 **Fig. S5 The composition and relative abundance of the major bacterial taxa in soil samples**  
 73 **in soil experiment.** Each bar represents the average value of three replicates in each sample  
 74 group. A. The composition and relative abundance of the major bacterial phyla; B-D. The  
 75 composition and relative abundance of the major bacterial orders from the phyla of Bacteroidetes  
 76 (B), Acidobacteria (C) and Proteobacteria (D); E. The composition and relative abundance of the  
 77 major bacterial orders from four classes of the phylum Proteobacteria: Alpha-proteobacteria,  
 78 Beta-proteobacteria, Delta-Proteobacteria and Gamma-proteobacteria. Commodity organic  
 79 nutritional soil (CF), potted plant nutrients soil (HF), vegetable field soil (DM), agricultural field  
 80 soil (HQ), campus lawn (JX), forest soil (QS) and garden soil (XC).

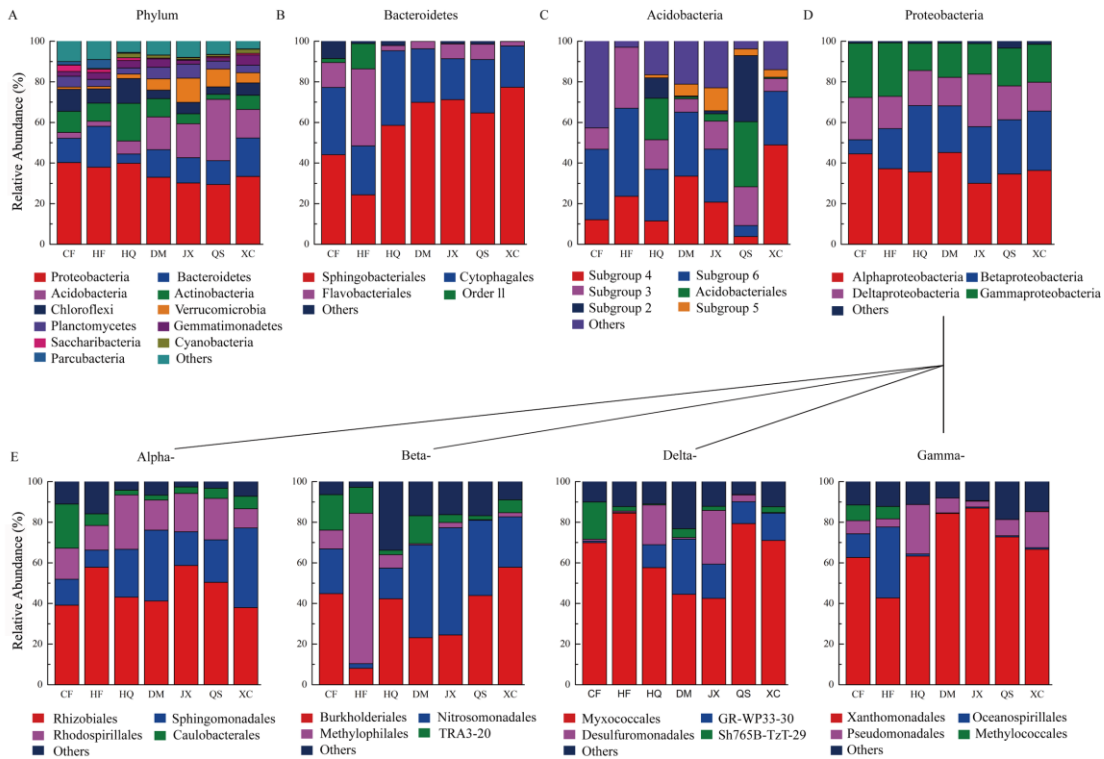

81

82

83

84 **Fig. S6 Beta diversity analysis to estimate the dissimilarity and similarity of bacterial**  
 85 **communities and composition among the samples.** A. Principal coordinated analysis (PCoA)  
 86 derived from the dissimilarity matrix of the weighted UniFrac distance among the cultivar  
 87 samples in cultivar experiment. B. The hierarchical cluster analysis of the bacterial community  
 88 composition among the cultivar samples in cultivar experiment. C. Principal coordinated analysis  
 89 (PCoA) derived from the dissimilarity matrix of the weighted UniFrac distance among the soil  
 90 samples in soil experiment. D. The hierarchical cluster analysis of the bacterial community  
 91 composition among the soil samples in soil experiment.

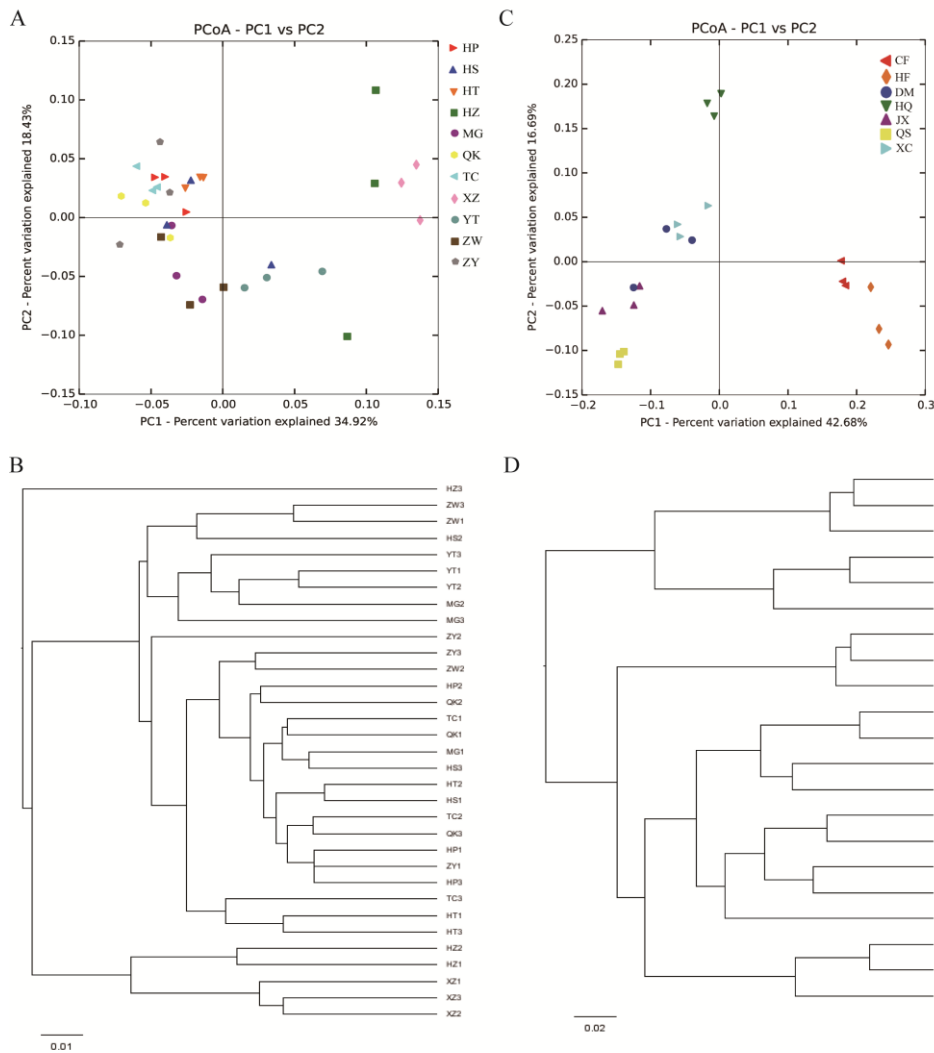

Supplement: microorganisms-08-00170-s001.pdf [file microorganisms-08-00170-s001.pdf]
